## RESEARCH ARTICLE

# Designing of a chimeric multiepitope vaccine against bancroftian lymphatic filariasis through immunoinformatics approaches

Rehana Parvin<sup>1</sup>, Md. Habib Ullah Masum<sup>2\*</sup>, Jannatul Ferdous<sup>3</sup>, Ahmad Abdullah Mahdeen<sup>4</sup>, Md. Shafiqul Islam Khan<sup>5</sup>

**1** Department of Pathology and Parasitology, Faculty of Veterinary Medicine, Chattogram Veterinary and Animal Sciences University (CVASU), Chattogram, Bangladesh, **2** Department of Genomics and Bioinformatics, Faculty of Biotechnology and Genetic Engineering, Chattogram Veterinary and Animal Sciences University (CVASU), Chattogram, Bangladesh, **3** Department of Obstetrics and Gynecology, Chittagong Medical College, Chittagong, Bangladesh, **4** Department of Microbiology, Noakhali Science and Technology University, Noakhali, Bangladesh, **5** Department of Cellular and Molecular Biology, Faculty of Biotechnology and Genetic Engineering, Chattogram Veterinary and Animal Sciences University (CVASU), Chattogram, Bangladesh

\* [habibullahmasummbg5005@gmail.com](mailto:habibullahmasummbg5005@gmail.com), [mhumasum@cvasu.ac.bd](mailto:mhumasum@cvasu.ac.bd)

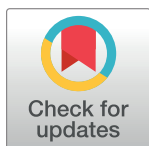

## OPEN ACCESS

**Citation:** Parvin R, Habib Ullah Masum M., Ferdous J, Mahdeen AA, Shafiqul Islam Khan M. (2024) Designing of a chimeric multiepitope vaccine against bancroftian lymphatic filariasis through immunoinformatics approaches. PLoS ONE 19(9): e0310398. <https://doi.org/10.1371/journal.pone.0310398>

**Editor:** Rajesh Kumar Pathak, Chung-Ang University, REPUBLIC OF KOREA

**Received:** June 23, 2024

**Accepted:** September 1, 2024

**Published:** September 19, 2024

**Copyright:** © 2024 Parvin et al. This is an open access article distributed under the terms of the [Creative Commons Attribution License](https://creativecommons.org/licenses/by/4.0/), which permits unrestricted use, distribution, and reproduction in any medium, provided the original author and source are credited.

**Data Availability Statement:** All relevant data are within the manuscript and its [Supporting Information](#) files.

**Funding:** The author(s) received no specific funding for this work.

**Competing interests:** The authors have declared that no competing interests exist.

## Abstract

The filarial worms of *Wuchereria bancrofti* are the primary cause of lymphatic filariasis (LF), a mosquito-borne disease among the neglected tropical parasitic diseases. Considering the global endemic consequences of the disease, there is a need to develop a successful vaccine candidate against LF. Using advanced immunoinformatics approaches, we designed two multiepitope vaccines targeting *W. bancrofti*'s glutathione S-transferase and thioredoxin. Therefore, we predicted several MHC-1, MHC-2, and B-cell epitopes from these proteins and mapped two vaccine candidates (V1 and V2). The vaccines were subsequently employed for physicochemical analysis, structural prediction and validation, docking and normal mode analysis, codon optimization, and immune simulation. The selected MHC-1, MHC-2, and B-cell epitopes were antigenic without allergenicity or toxicity. The designed vaccines were expected to be soluble, stable proteins under physiological conditions. Compared to V2, V1's secondary and tertiary structures were simultaneously favorable, with Ramachandran plot analysis revealing 95.6% residues in favored areas. Subsequently, the molecular docking analysis indicated that the V1 had a high binding affinity for the TLR-2, TLR-4 and TLR-5, as suggested by the docking scores of -1248.7, -1038.5 and -1562.8, respectively. The NMA of these complexes further indicated their structural flexibility. Molecular dynamics simulations of V1-TLR complexes revealed V1-TLR-4 as the most stable, with the lowest free energy and minimal fluctuations, indicating the strongest binding affinity. The results of the codon optimization showed high levels of expression, with a favorable CAI score (<1.0). A three-dose vaccination analysis showed significant and persistent immunological responses, including adaptive and innate immune responses. The findings emphasize the potential of the V1 against *W. bancrofti*, but further validation is required through *in vitro*, *in vivo*, and clinical trials.

## 1. Introduction

Lymphatic filariasis (LF), also known as elephantiasis, is a mosquito-borne parasitic infection caused by the filarial nematodes *Wuchereria bancrofti*, *Brugia malayi*, and *Brugia timori* [1–3]. According to the World Health Organization (WHO), 90% of LF cases are associated with *W. bancrofti* infection, which is also known as bancroftian lymphatic filariasis (BLF) [2, 4, 5]. LF, a highly significant form of filarial infection, primarily affects the human lymphatic system and can persist in the body for 5–10 years by evading the host's defense mechanisms [6]. Based on a survey released in 2008, LF is endemic in over 83 countries worldwide [7–9]. Southeast Asia—including Bangladesh, India, Nigeria, and Indonesia—has become the global hub for LF, accounting for 70% of cases [10, 11]. As reported earlier, LF has already infected 120 million people and poses a risk to over 1.2 billion [12]. Global Programme to Eliminate LF (GPELF) was initiated in 2000 to eliminate LF by 2020, and it was authorized by the World Health Assembly Resolution 50.29 (WHA 50.29) [12]. A recent WHO report indicates that 882.5 million people across 44 countries remain at risk for LF [2, 13].

The causative agent of LF are primarily transmitted by vector mosquitoes from the *Anopheles*, *Aedes*, *Culex*, and *Mansonia* genera [14, 15], with variations depending on the region [8]. In India, *Culex* spp. is the primary carrier of the parasite, which is responsible for 99.4% of LF cases [16–18]. However, in other areas, including the island of New Guinea, Southern Asia, and West Africa, *Anopheles* species play a critical role in the spread of the disease [7–9]. Several health issues have been seen as a consequence of this disease, including hydrocele, lymphedema, elephantiasis, chyluria, chylous diarrhea, chylorrhagia [19, 20] and fatal chronic conditions [9, 21]. In principle, LF is the second leading cause of long-term disability, after mental disorders [22, 23], with approximately 40 million people either disabled or incapacitated by the disease [12, 24, 25].

Mass drug administration (MDA) has long been employed to fight LF, utilizing diethylcarbamazine citrate (DEC) as well as a combination of DEC and albendazole [12, 26]. However, the disease has yet to be eradicated due to several imperfections with the current medications, including poor absorption, toxic side effects, limited effectiveness against adult parasites, and low absorption [1]. Therefore, alternative strategies like pre-immunization or vaccination are required to eradicate the occurrences of LF [27]. And these approaches need to be effective against the parasite throughout all or most stages of its life cycle [22, 23]. The conventional approach for developing vaccine candidates and triggering the appropriate antibody-mediated response is expensive, time-consuming, and labor-intensive. On the other hand, vaccines produced by immunoinformatics approaches address the drawbacks of traditional approaches. These approaches use pathogen genomic data, such as the epitope map, to develop vaccines instead of using in vitro culture of parasites [28, 29].

The presence of the redox regulatory system in the filarial parasite is one of the most important factors behind its survival within the host body. Hence, antioxidants such as glutathione S-transferase and thioredoxin are the key redox-active proteins essential for their survival in the host body [30, 31]. Where these proteins facilitate the parasite to survive and withstand oxidative stress of the host defense mechanism, including reactive oxygen species (ROS) components [24, 32]. Both proteins play an essential role in maintaining redox homeostasis by reducing hydrogen peroxide (H<sub>2</sub>O<sub>2</sub>) [24, 31], catalyzing the dismutation of the superoxide radical as a detoxification process, and protecting the parasite's membranes from damage by phospholipid peroxidation [24, 30]. However, both proteins are known to be expressed throughout the filarial parasite's lifespan, so generating a vaccine against it could effectively combat all stages of filarial parasite development [24, 31].

This study aims to design a chimeric multiepitope vaccine against *W. bancrofti* that could effectively combat LF. We employed advanced immunoinformatics approaches to predict epitopes specific to T cells (major histocompatibility complex-1), cytotoxic T lymphocytes (major histocompatibility complex-2), and B-cells based on the amino acid sequences of two proteins: glutathione S-transferase and thioredoxin. The epitopes were linked using four linkers (EAAAK, AYY, AK, and KFER). Finally, two immune stimulatory adjuvants, heparin-binding hemagglutinin (HBHA) and 50S ribosomal protein L7/L12 (bl12) were used in the vaccine map and linked to the remaining epitope to construct the final vaccine map.

## 2. Materials and methods

### 2.1 Sequence retrieval

The National Centre for Biotechnology Information (NCBI) protein database was accessed to acquire the amino acid sequences of *W. bancrofti*'s two primary proteins, glutathione S-transferase and thioredoxin [33]. The protein codes were saved in the FASTA file, which was then used to construct the vaccine. Fig 1 shows an outline of the work.

### 2.2 Prediction of MHC-1, MHC-2 and linear B-cell epitope

The MHC-1 binding epitopes of the retrieved proteins, including glutathione S-transferase and thioredoxin, were predicted by the MHC-1 Binding Predictions tool of the Immune Epitope Database (IEDB) [34, 35] and Net-MHC 4.0 (<http://www.cbs.dtu.dk/services/NetMHC/>) server [36, 37]. Likewise, the MHC-2 binding epitopes were also predicted using the IEDB's MHC-2 Binding Predictions tool [34, 35] (<http://tools.iedb.org/mhcii/>) and NetMHCIIpan 4.0 server (<http://www.cbs.dtu.dk/services/NetMHCIIpan/>) [35, 38]. Further, the linear B-cell epitopes of the protein of interest were predicted by the IEDB's Antibody Epitope Prediction tool and the ABCpred ([https://webs.iitd.edu.in/raghava/abcpred/ABC\\_submission.html](https://webs.iitd.edu.in/raghava/abcpred/ABC_submission.html)) server [39]. The selected epitopes were further evaluated for antigenicity, allergenicity and toxicity by VaxiJen 2.0 [40], AllerTOP v. 2.0 [41] and ToxinPred server [42], respectively.

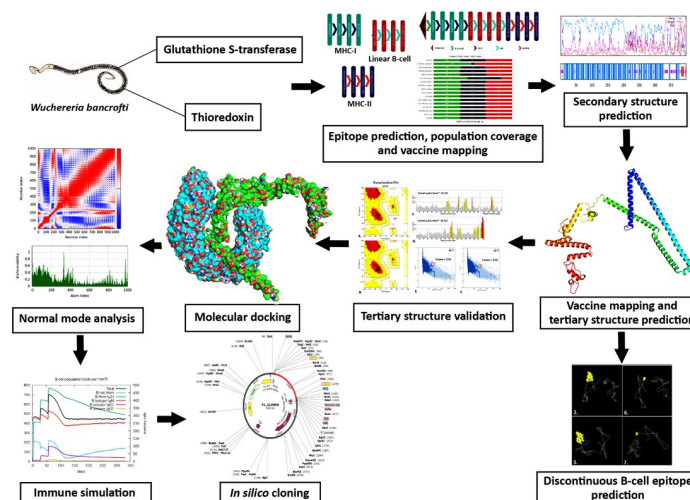

**Fig 1. The overview of the mRNA vaccine design.**

<https://doi.org/10.1371/journal.pone.0310398.g001>

### 2.3 Population coverage

Variation in ethnicity and geography affects the frequency of individual HLA alleles [43, 44]. Therefore, the IEDB population coverage tool was employed to assess the potential population coverage of the designed vaccines (<http://tools.iedb.org/population/>) [45]. For this analysis, we used the chosen MHC-1, MHC-2 epitopes and their corresponding alleles (both combinedly and individually). We also highlighted the specific genetic variants that are found globally.

### 2.4 Vaccine mapping

The mapping of vaccine 1 (V1) and vaccine 2 (V2) was executed by utilizing highly prioritized epitopes from the selected proteins (glutathione S-transferase and thioredoxin). Heparin-binding hemagglutinin (HBHA) was used as an immunostimulatory adjuvant in V1, while the 50S ribosomal protein L7/L12 (bl12) was used in V2. Appropriate linkers, including EAAAK, AYY, AK, and KFER, were employed in the final vaccine mapping process.

### 2.5 Post-vaccine mapping analysis

After mapping the vaccines, the physicochemical properties, solubility, allergenicity, and antigenicity were analyzed. The properties examined included molecular weight, total amino acid count, instability index, aliphatic index, isoelectric point (pI), grand average of hydropathicity (GRAVY), the number of positively and negatively charged residues, and the total number of atoms. These characteristics were predicted using the Expasy ProtParam server (<http://web.expasy.org/protparam/>) [46]. Subsequently, the SOLpro server was used to calculate the solubility of the vaccines (<https://scratch.proteomics.ics.uci.edu/>) [47]. Any allergenic properties of the vaccines were also evaluated by AllerTOP v. 2.0 server (<https://www.ddg-pharmfac.net/AllerTOP/>) [41] and AlgPred (<https://webs.iitd.edu.in/raghava/algpred/submission.html>) [48]. Finally, the antigenic characteristics of the vaccines were also assessed by SCRATCH (<http://scratch.proteomics.ics.uci.edu>) [49] and VaxiJen 2.0 server [40].

### 2.6 Secondary and tertiary structure prediction, refinement, and validation

The secondary structures of the vaccines were predicted by the GOR4, and SOPMA server [16, 17, 50, 51], whereas the 3Dpro program of the SCRATCH suite was utilized for the tertiary (3D) structure prediction [52]. The 3D structures of the vaccines were further applied for structural refinement by the GalaxyWEB server [53]. Afterward, the structural validations of the vaccines were carried out by the SAVES v6.0 server (<https://saves.mbi.ucla.edu/>), which defines the stereochemical quality of the predicted vaccine models through Ramachandran plot and ERRAT analysis [54–57]. We utilized the ProSA-web server to assess the precision of the predicted vaccines' 3D model structure. The server offers a Z-score to evaluate the precision and potential flaws of the predicted 3D model structures [58, 59]. Here, a lower Z-score indicates a higher-quality protein model [59].

### 2.7 Prediction of discontinuous B-cell epitopes

Discontinuous B-cell epitopes are essential for effective vaccine design because they naturally mimic the structure of pathogens, leading to a more robust immune response. These epitopes comprise non-consecutive amino acids arranged into a three-dimensional shape, crucial for precise antibody attachment [60]. Hence, the discontinuous B-cell epitopes of the vaccines were predicted by the Ellipro (<http://tools.iedb.org/ellipro/>) server [61]. The server (<http://tools.iedb.org/ellipro/>) predicts potent discontinuous B-cell epitopes via a combination of three algorithms [61].

## 2.8 Molecular docking study

Considering the molecular docking study, the CLUSPRO 2.0 ([cluspro.bu.edu/login.php](http://cluspro.bu.edu/login.php)) server was utilized to identify the binding affinities of the vaccines towards the human TLRs (Toll-like receptors) [62–65]. The tertiary structures of the TLR-2 (Toll-like receptor 2) (PDB: 2Z7X), TLR-4 (Toll-like receptor 4) (PDB: 3FXI) and TLR-5 (Toll-like receptor 5) (PDB: 3J0A) were obtained from the Protein Data Bank (PDB) database ([www.rcsb.org](http://www.rcsb.org)) before the docking study [66–68]. The docked complexes were then visualized by the PyMOL, while the intermolecular interactions were analyzed by the PDBsum server [69].

## 2.9 Normal mode analysis

The functional movements of macromolecules can be characterized by the NMA [70–72]. Consequently, the functional and macromolecular movements of the "V1-TLR-2", "V1-TLR-4", "V1-TLR-5", "V2-TLR-2", "V2-TLR-4", and "V2-TLR-5" complexes were executed by the iMODS server [72]. The server offers a variety of substantial motion configurations, including affine-model arrows, vector fields, and modal animations. Hence, it calculates various properties, such as mobility (B-factor), deformability, eigenvalues, covariance map, and linkage matrix. [72]. The B-factor quantifies how atoms deviate from their equilibrium position in a structure. The deformability plot is a visual representation of the flexibility of proteins, specifically focusing on coil or domain linkers. Moreover, the eigenvalue indicates the complex's stability, with larger values indicating a greater degree of stability [71, 72].

## 2.10 Molecular dynamic simulation

After evaluating the quality of the tertiary structure and analyzing the findings of molecular docking and normal mode analysis, we selected the V1 and its complexes for further investigations. A molecular dynamic simulation was conducted to assess the stability of the "V1-TLR-2", "V1-TLR-4", and "V1-TLR-5" complexes in a simulated physiological environment utilizing a virtual model building with energy refinement (AMBER 18) [73], and ff19SB force field [74] with OPC water model [75, 76]. Three-layer solvation was achieved by utilizing the octahedron box shape with the V1, "V1-TLR-2", "V1-TLR-4", and "V1-TLR-5" complexes, ensuring their positions were at least 12Å away from the edge of the water-filled box [77]. The system was neutralized with the concurrence of Amber's "tleap" package by adding Na<sup>+</sup> and Cl<sup>−</sup> counter ions. The systems were reduced at 500 steepest descent cycles and 1000 conjugate gradient steps to remove constraint atoms. To achieve conformational stability, the systems were heated for fifty picoseconds (ps) utilizing langevin dynamics and kept the temperature at 300 K throughout the experiment. Subsequently, the system was stabilized for 5 nanoseconds (ns) under controlled temperature and pressure conditions using isotropic position scaling. The simulation was conducted throughout 100 nanoseconds using the SHAKE and particle-mesh Ewald (PME) strategies in the pmemd.cuda [78, 79]. A cut-off radius of 10Å was used to determine non-bond contacts in long-term interactions.

## 2.11 Molecular mechanics with generalised born and surface area solvation (MMGBSA)

Using the molecular mechanics and the generalized born approach, the free binding energies ( $\Delta$ TOTAL) associated with the "V1-TLR-2", "V1-TLR-4", and "V1-TLR-5" were evaluated. During this analysis, different intermolecular interactions were analyzed, including van der Waals forces ( $\Delta$ VDWAALS), electrostatic interactions ( $\Delta$ EEL), as well as polar ( $\Delta$ EGB) and non-polar ( $\Delta$ ESURF) components [80–82]. However, the HawkDock server was utilized for

the MMGBSA analysis [80–82], where the accuracy of the server was reported to be between 80–95% for the crystal and predicted structures [83].

## 2.12 Molecular mechanics poisson-boltzmann surface area (MMPBSA)

The MMPBSA.py package of AMBER 18 program was utilized to execute the MMPBSA for the "V1-TLR-2", "V1-TLR-4", and "V1-TLR-5" complexes [84]. This molecular mechanic approach, like MMGBSA, evaluates several intermolecular interactions, including binding contacts ( $\Delta$ TOTAL), electrostatic interactions ( $\Delta$ EEL), van der Waals forces ( $\Delta$ VDWAALS), polar ( $\Delta$ EGB), and non-polar ( $\Delta$ ESURF) components [80–82].

## 2.13 Codon optimization and *in silico* cloning

The Java Codon Adaptation Tool (JCat) server (<http://www.jcat.de/Start.jsp>) was used to optimize the codons of the vaccine candidate, employing the *E. coli* strain K12. To assess a protein's expression level, the server calculates its GC contents and codon adaptation index (CAI). On the other hand, a score of  $\geq 0.8$  is accepted as good, and  $\geq 1.0$  is the best CAI value. However, the permissible GC contents can vary from 30% to 70% [85, 86]. Afterward, the optimized gene sequence of the V1 was ligated to the *E. Coli* plasmid vector pET-28a(+), with restriction sites EcoRI and BamHI at N and C-terminals of the corresponding vaccine sequence. Finally, using the SnapGene program (<https://www.snapgene.com/free-trial/>), the optimized V1 sequence was transferred into the plasmid vector pET-28a(+).

## 2.14 Immune simulation

The immune simulations of the V1 were assessed using the C-ImmSim server (<https://kraken.iac.rm.cnr.it/C-IMMSIM/>) [87]. The simulation was assessed for different HLA populations, including Europe (HLA-A\*01:01, HLA-A\*02:01, HLA-B\*07:02, HLA-B\*51:01, HLA-DRB1\*15:01, and HLA-DRB1\*07:01), South, West and Central Asia (HLA-A\*02:01, HLA-A\*11:01, HLA-B\*51:01, HLA-B\*07:02 and HLA-DRB1\*07:01), North and Central America (HLA-A\*02:01, HLA-A\*24:02, HLA-B\*15:01, HLA-B\*51:01, HLA-DRB1\*15:01, and HLA-DRB1\*07:01), Oceania (HLA-A\*24:02, HLA-A\*11:01, HLA-B\*40:01, HLA-B\*15:01, HLA-B\*51:01, HLA-DRB1\*15:01, and HLA-DRB1\*07:01), North and East Asia (HLA-A\*02:01, HLA-A\*24:02, HLA-B\*15:01, HLA-B\*51:01, and HLA-DRB1\*15:01), South America (HLA-A\*02:01, HLA-A\*24:02, HLA-B\*15:01, and HLA-DRB1\*15:01). To ensure proper immunization, the V1 was designed with three doses of a regime that will be administered at four-week intervals. The simulation was run using the server's default parameters, with time steps set to 1, 84, and 168. Finally, the simulation steps and volume were set to 50 and 1000, respectively. The server's default configuration without lipopolysaccharides (LPS) was also set to the random seed.

# 3. Results

## 3.1 Sequence retrieval

The amino acid sequences of *W. bancrofti*'s two primary proteins, glutathione S-transferase (accession number: AAO45827.1) and thioredoxin (accession number: EJJW80481.1), were obtained from the National Center for Biotechnology Information (NCBI) protein database. These protein sequences were saved in FASTA format and subsequently used for vaccine design.

### 3.2 Prediction of MHC-1, MHC-2 and linear B-cell epitope

A total of 12 epitopes, including four MHC-1, four MHC-2 and four B-cell epitopes, were selected from the retrieved proteins. The threshold value was set at <2.0 while selecting the MHC-1 and MHC-2 epitopes. However, 26 HLA alleles (HLA-B\*44:02, HLA-B\*15:01, HLA-A\*68:01, HLA-B\*57:01, HLA-A\*03:01, HLA-A\*02:06, HLA-A\*30:02, HLA-A\*24:02, HLA-A\*23:01, HLA-B\*07:02, HLA-A\*31:01, HLA-B\*40:01, HLA-B\*08:01, HLA-A\*11:01, HLA-A\*30:01, HLA-A\*33:01, HLA-A\*32:01, HLA-A\*26:01, HLA-B\*53:01, HLA-B\*44:03, HLA-B\*35:01, HLA-A\*01:01, HLA-A\*68:02, HLA-B\*58:01, HLA-B\*51:01, HLA-A\*02:01 and HLA-A\*02:03) were chosen for MHC-1 and 7 HLA-DRB alleles (HLA-DRB4\*01:01, HLA-DRB3\*01:01, HLA-DRB5\*01:01, HLA-DRB1\*15:01, HLA-DRB1\*03:01, HLA-DRB3\*02:02 and HLA-DRB1\*07:01) were chosen for MHC-2 epitope prediction. However, for the final vaccine construct, the most probable antigenic, non-allergenic, and non-toxic MHC-1, MHC-2, and B-cell epitopes were selected from each protein ([Table 1](#)).

### 3.3 Population coverage

The total population coverage is consistently at or nearly 100% worldwide ([Fig 2](#)). Most regions demonstrate substantial coverage for MHC-1 and MHC-2 epitopes, suggesting strong overall population coverage. However, the overall MHC-1 epitope coverage is high, except for 7.76% in Central America, and MHC-2 epitope coverage exists high, with a distinction of 32.1% in South Africa. However, the population coverage showed a worldwide distribution of specific genetic variations on various continents, both individually and in combination ([Fig 2](#)).

### 3.4 Vaccine mapping

Adjuvants play a vital role in vaccine development by enhancing the vaccine's ability to trigger an immune response, increasing its stability, and prolonging its effectiveness [88]. To activate the innate and adaptive immune systems, they require a carrier that contains potent immunostimulatory adjuvants [89]. The epitopes were conjugated using two adjuvants, HBHA and bl12, and were used in the V1 and V2, respectively. Linkers are necessary for the vaccine's design to replicate the immunogen's ability to function as a separate immunogen and produce higher antibody concentrations than a single immunogen [90]. Four linkers, EAAAK, AYY, AK, and KFER, were used to join the selected adjuvants and epitopes in the final vaccine structures ([Fig 3](#)).

**Table 1. List of selected MHC-1, MHC-2, and B-cell epitopes with their antigenicity, allergenicity, and toxicity assessment.**

| Protein                   | Epitope | Peptide          | Perce-ntile rank | Allergenicity         | Antigenicity              | Toxicity  |
|---------------------------|---------|------------------|------------------|-----------------------|---------------------------|-----------|
| Glutathione S-transferase | MHC-1   | DTEKDSYIK        | 1.1              | Probable non-allergen | 1.8558 (Probable ANTIGEN) | Non-toxin |
|                           |         | VQSGAILRH        | 0.55             | Probable non-allergen | 0.6948 (Probable ANTIGEN) | Non-toxin |
|                           | MHC-2   | DHQIVQSGAILRH    | 0.47             | Probable non-allergen | 0.5530 (Probable ANTIGEN) | Non-toxin |
|                           |         | KDSYIKDILPVELAK  | 1.3              | Probable non-allergen | 1.0979 (Probable ANTIGEN) | Non-toxin |
|                           | B-cell  | KYAKMIYQAYDTEKDS | 0.82             | Probable non-allergen | 0.9893 (Probable ANTIGEN) | Non-toxin |
|                           |         | AKFEKLLATRDDGKNF | 0.72             | Probable non-allergen | 0.7721 (Probable ANTIGEN) | Non-toxin |
| Thioredoxin               | MHC-1   | HMYLFPMK         | 0.16             | Probable non-allergen | 0.8051 (Probable ANTIGEN) | Non-toxin |
|                           |         | KYPTLKLFR        | 0.15             | Probable non-allergen | 1.0880 (Probable ANTIGEN) | Non-toxin |
|                           | MHC-2   | DNYRKVASLLRDDCV  | 0.12             | Probable non-allergen | 0.6148 (Probable ANTIGEN) | Non-toxin |
|                           |         | ADALAVFIDKQLVSG  | 0.23             | Probable non-allergen | 0.9933 (Probable ANTIGEN) | Non-toxin |
|                           | B-cell  | KKEYRGQRSADALAVF | 0.89             | Probable non-allergen | 0.8089 (Probable ANTIGEN) | Non-toxin |
|                           |         | NAVAWATVDCDREADI | 0.83             | Probable non-allergen | 0.8901 (Probable ANTIGEN) | Non-toxin |

<https://doi.org/10.1371/journal.pone.0310398.t001>



**Table 2. The physicochemical and immunological properties of the V1 and V2.**

| Physicochemical properties                            | V1                    | V2                    |
|-------------------------------------------------------|-----------------------|-----------------------|
| Molecular Weight (Da)                                 | 21534.46              | 1344.48               |
| Number of amino acids                                 | 199                   | 130                   |
| Theoretical pI                                        | 9.17                  | 4.59                  |
| Grand average of hydropathy (GRAVY)                   | -0.593                | 0.180                 |
| Instability index                                     | 46.67                 | 19.91                 |
| Aliphatic index                                       | 84.67                 | 103.77                |
| Total number of negatively charged residues (Asp+Glu) | 32                    | 25                    |
| Total number of positively charged residues (Arg+Lys) | 36                    | 16                    |
| Number of atoms                                       | 3083                  | 1935                  |
| Solubility (SOLpro)                                   | Soluble protein       | Soluble protein       |
| Allergenicity (AlgPred /AllerTop)                     | Probable non-allergen | Probable non-allergen |
| Antigenicity (VaxiJen 2.0/ SCRATCH)                   | Probable Antigen      | Probable Antigen      |

<https://doi.org/10.1371/journal.pone.0310398.t002>

### 3.6 Secondary and tertiary structure prediction, refinement and validation

The secondary structures of the V1 and V2 were predicted using the GOR4 and SOPMA servers. For V1, the GOR4 server indicated 78.70% alpha helix, 3.01% extended strands (beta sheet), and 18.30% random coil structure. Meanwhile, the SOPMA server predicted 70.18% alpha helix, 7.27% extended strands, and 19.55% random coil for V1. Notably, SOPMA predicted 3.01% beta-turn structures in V1, which were not identified by the GOR4 (**Table 3 and S1 Fig**). For V2, the GOR4 server indicated 67.88% alpha helix, 6.97% extended strands (beta sheet), and 25.15% random coil structure. In contrast, the SOPMA server predicted 59.70% alpha helix, 10.91% extended strands, and 21.52% random coil for V2. Additionally, the SOPMA predicted 7.88% beta-turn structures in V2, which were not detected by the GOR4 (**Table 3 and S1 Fig**).

The SCRATCH's 3Dpro program predicted two reliable 3D structures for the V1 and V2. The refined 3D model of V1 was later obtained from the GalaxyWEB server, with an RMSD of 0.301, a MolProbity score of 2.783, and 94.8% of residues in Ramachandran's favored region. Meanwhile, the refined 3D model of the V2 represented RMSD, MolProbity score, and Ramachandran's favored region of 0.439, 2.731, and 93.4%, respectively, accomplishing both proteins with well-stable 3D structures. However, the SAVES's Ramachandran plot depicted that 95.6% of amino acid residues of the refined V1 are in the most favored region, while 3.8% are in the additional allowed and generously allowed region (**Fig 4A**). On the other hand, the refined V2 has 96.9% amino acid residues in the most favored region, whereas 9.6% are in the additional and generously allowed region (**Fig 4B**). The ERRAT score for the refined V1 model was 92.533, whereas the V2 model received an ERRAT score of 86.032 (**Fig 4C and 4D**). Additionally, the ProSA server confirmed the energy-minimized models' quality by assigning Z-scores of -3.55 for V1 and -2.22 for V2 (**Fig 4E and 4F**). A lower z-score indicates

**Table 3. Secondary structure predictions and comparative assessment of V1 and V2 using GOR4 and SOPMA.**

| Properties      | V1           |              | V2           |              |
|-----------------|--------------|--------------|--------------|--------------|
|                 | GOR4         | SOPMA        | GOR4         | SOPMA        |
| Alpha helix     | 78.70% (314) | 70.18% (280) | 67.88% (224) | 59.70% (197) |
| Extended strand | 3.01% (12)   | 7.27% (29)   | 6.97% (23)   | 10.91% (36)  |
| Beta turn       | 0.00% (0)    | 3.01% (12)   | 0.00% (00)   | 7.88% (26)   |
| Random coil     | 18.30% (73)  | 19.55% (78)  | 25.15% (83)  | 21.52% (71)  |

<https://doi.org/10.1371/journal.pone.0310398.t003>

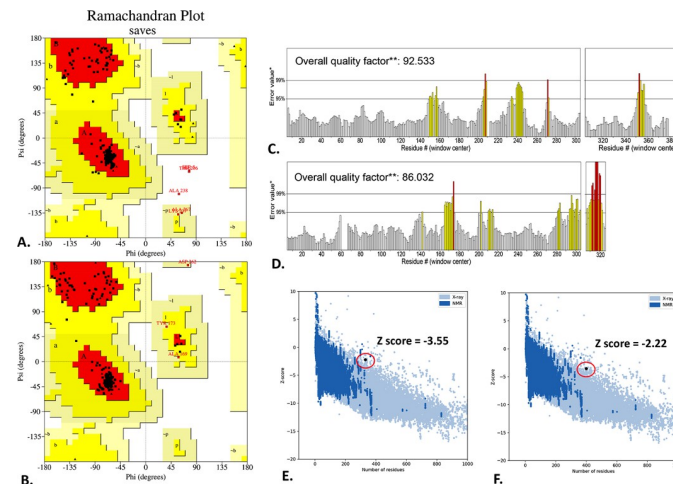

**Fig 4. Structural validation of the V1 and V2 predicted by I-TASSER.** The refined 3D structures are evaluated through the Ramachandran plot (A, B), ERRAT (C, D), and Z score (E, F).

<https://doi.org/10.1371/journal.pone.0310398.g004>

a higher-quality protein model; hence, the model quality of the V1 is better than the V2 model quality [59].

### 3.7 Prediction of discontinuous B-cell epitopes

The Ellipro server predicted 196 discontinuous B-cell epitopes for V1 and 168 for V2 (Fig 5 and S1 Table). V1 epitopes score between 0.509 and 0.825, depending on the number of residues, while V2 epitopes score between 0.513 and 0.975 (S1 Table). The higher the score, the more likely the location in the query will function as a conformational B-cell epitope. As a result, these vaccination sites might behave as B-cell epitopes, potentially producing antibodies (Fig 5).

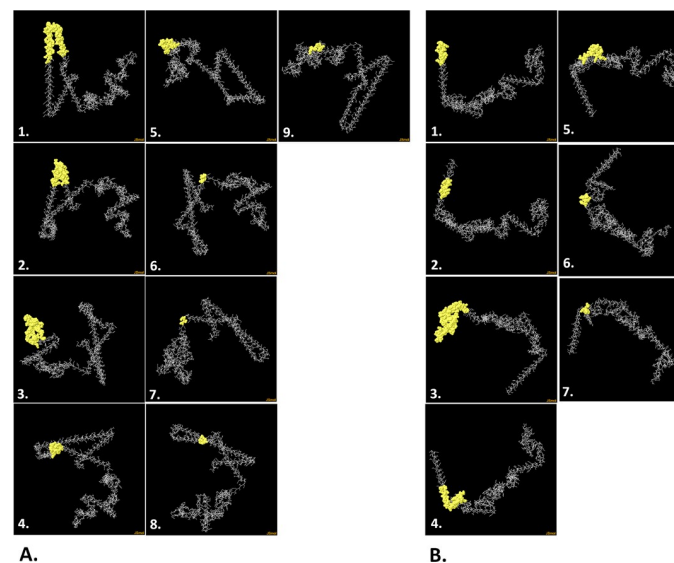

**Fig 5. The discontinuous B-cell epitopes of the V1 (A) and V2 (B) predicted by Ellipro server.** The discontinuous B-cell epitopes are presented as yellow-color surfaces while the whole vaccines are depicted with grey sticks.

<https://doi.org/10.1371/journal.pone.0310398.g005>

### 3.8 Molecular docking study

The docking analyses between the vaccines (V1 and V2) and human TLR-2, TLR-4 and TLR-5 were performed using the CLUSPRO 2.0 server. According to the server, the lowest energy scores of the "V1-TLR-2", "V1-TLR-4", and "V1-TLR-5" complexes were predicted to be -1248.7, -1038.5 and -1562.8, respectively. On the other hand, the lowest energy scores of the "V2-TLR-2", "V2-TLR-4" and "V2-TLR-5" complexes were predicted to be -1004.2, -1078.5 and -1354.5 respectively. Further, PyMOL and PDBsum tools visualized and analyzed these docked complexes.

Based on the PDBsum, the "V1-TLR-2" complex has 5 hydrogen bonds, 19 salt bridges, and 289 non-bond interactions, whereas the "V1-TLR-4" complex has 4 hydrogen bonds, 2 salt bridges, and 257 non-bond interactions. Moreover, the "V1-TLR-5" has a similar number of hydrogen bonds, salt bridges and non-bond interactions to the "V1-TLR-2" (Table 4 and Fig 6). Regarding the "V2-TLR-2", the server predicted 15 hydrogen bonds, 6 salt bridges and 155 non-bond interactions, whereas, it predicted 15 hydrogen bonds, 6 salt bridges and 155 non-bond interactions in the "V2-TLR-4". However, maximum intermolecular interactions were found in the "V1-TLR-5", including 24 hydrogen bonds, 10 salt bridges and 328 non-bond interactions. Interestingly, none of these complexes contain disulfide bonds (Table 4 and S2 Fig).

### 3.9 Normal mode analysis

The iMODS server was employed to perform NMA analyses on the "V1-TLR-2", "V1-TLR-4", "V1-TLR-5", "V2-TLR-2", "V2-TLR-4", and "V2-TLR-5" docked complexes, offering a detailed evaluation of their structural integrity and changes. The deformability graph highlights the flexible regions of the docked complexes through graphical peaks (Figs 7A–7C and S3). Additionally, the eigenvalue of the complexes, which indicates their structural flexibility and rigidity, showed values of  $5.737061e-07$ ,  $5.294024e-07$ ,  $6.008857e-07$ ,  $1.209879e-07$ ,  $2.061794e-06$ , and  $1.892946e-06$  for the "V1-TLR-2", "V1-TLR-4", "V1-TLR-5", "V2-TLR-2", "V2-TLR-4", and "V2-TLR-5" complexes, respectively (Figs 7D–7F and S3). The covariance map in the NMA analysis depicts the correlated, uncorrelated, and anti-correlated movements between residues in the structures, represented by red, white, and blue colors, respectively (Fig 7G–7I and S3).

Additionally, the B-factor graph illustrated the simulation of the docked complexes involving NMA and the PDB sector. The B-factor values represent the extent of atomic displacements, revealing higher deformability in the "V1-TLR-2", "V1-TLR-4", "V1-TLR-5", "V2-TLR-2", "V2-TLR-4", and "V2-TLR-5" docked complexes, which implies greater flexibility (Figs 8A–8C and S4). The variance graph displayed the cumulative variance in cyan and the individual variance in purple. In the docked complexes, the first three modes out of twenty account for 80% of the total variance (Figs 8D–8F and S4). The elastic map of the docked complexes,

**Table 4.** The docking scores and interactions between the vaccine-receptor complexes.

| Vaccine | Complex  | Lowest energy | Interactions between the vaccine and TLRs |                  |                |                     |
|---------|----------|---------------|-------------------------------------------|------------------|----------------|---------------------|
|         |          |               | Salt bridges                              | Disulphide bonds | Hydrogen bonds | Non-bonded contacts |
| V1      | V1-TLR-2 | -1248.7       | 5                                         | -                | 19             | 289                 |
|         | V1-TLR-4 | -1038.5       | 5                                         | -                | 2              | 257                 |
|         | V1-TLR-5 | -1562.8       | 5                                         | -                | 19             | 289                 |
| V2      | V2-TLR-2 | -1004.2       | 6                                         | -                | 15             | 155                 |
|         | V2-TLR-4 | -1078.5       | 5                                         | -                | 14             | 169                 |
|         | V2-TLR-5 | -1354.5       | 10                                        | -                | 24             | 328                 |

<https://doi.org/10.1371/journal.pone.0310398.t004>

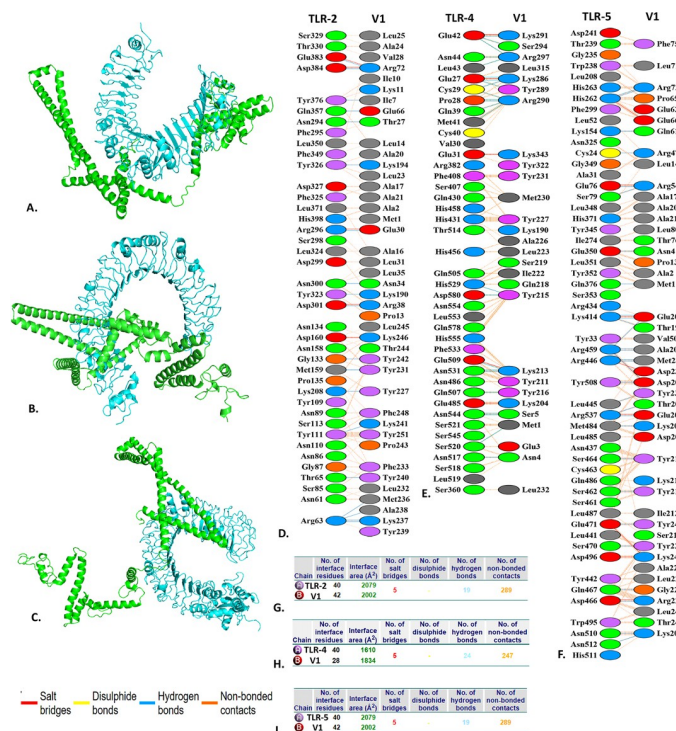

**Fig 6.** The docking analysis of the "V1-TLR-2" (A), "V1-TLR-4" (B), and "V1-TLR-5" (C) complexes. The intermolecular interactions between the "V1-TLR-2" (D, G), "V1-TLR-4" (E, H), and "V1-TLR-5" (F, I) complexes are represented as different color codes. The cyan and green colors represent the TLRs and V1, respectively. The red, yellow, blue, and orange colors represent the salt bridges, disulfide, hydrogen, and non-bonded contacts, respectively.

<https://doi.org/10.1371/journal.pone.0310398.g006>

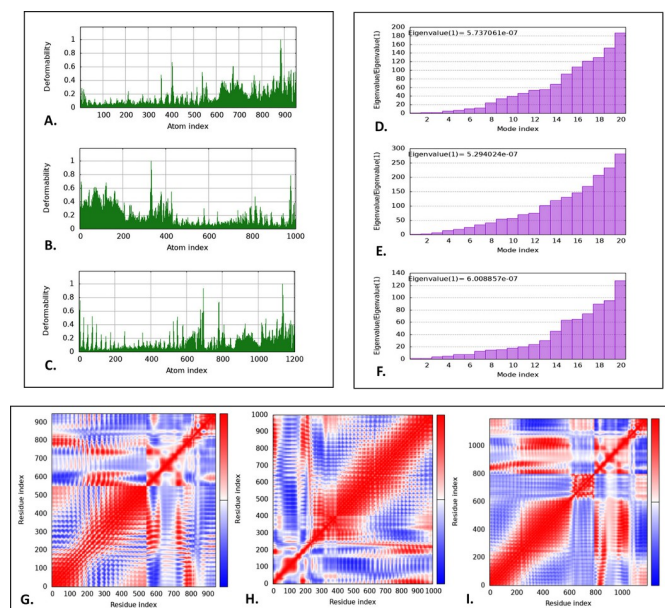

**Fig 7.** The normal mode analysis of the "V1-TLR-2", "V1-TLR-4", "V1-TLR-5", "V2-TLR-2", "V2-TLR-4", and "V2-TLR-5" docked complex. The illustration depicted the deformability plots (A, B, C), eigenvalue (D, E, F), and covariance map (G, H, I).

<https://doi.org/10.1371/journal.pone.0310398.g007>

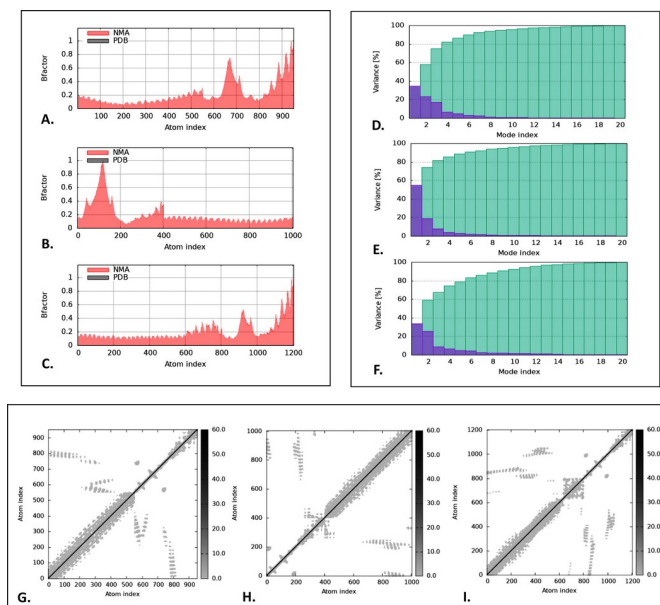

**Fig 8.** The iMODs illustration of the "V1-TLR-2", "V1-TLR-4", and "V1-TLR-5" docked complex. The illustration depicted the B-factor (A, B, C), variance (D, E, F), and elastic map (G, H, I).

<https://doi.org/10.1371/journal.pone.0310398.g008>

characterized by darker grey patches, indicates the interactions between atoms, suggesting the presence of more rigid regions (Figs 8G–8I and S4).

### 3.10 Molecular dynamic simulation

Considering the V1's exceptional tertiary structure quality and impressive affinity for the TLRs, we decided to utilize this structure for our subsequent analysis. Therefore, The V1, "V1-TLR-2", "V1-TLR-4", and "V1-TLR-5" complexes were dynamically simulated for 100 ns to determine their stability in dynamic mode. Several assessments, including RMSD, RMSF, Rg, and SASA, were performed for MD simulation. RMSD is often employed when exploring the dynamics and structures of macromolecules. The RMSD graphic shows if the system is in equilibrium and whether the simulation length is long enough. Given the circumstances, the simulation time is sufficient for the V1, "V1-TLR-2", "V1-TLR-4", and "V1-TLR-5" complexes. This is supported by the RMSD diagram of the simulated complexes, which reached a plateau, indicating that the system has reached equilibrium. Throughout the simulation regime, the RMSD of the V1 and "V1-TLR-4" seemed to fluctuate less and remained under 1 nm, suggesting the structural stability and flexibility of the complexes. Compared to these complexes, the average RMSD of the "V1-TLR-2" and "V1-TLR-5" were more fluctuated and exceeded the acceptable value (>1 nm), suggesting the structural rigidity of the complexes. Therefore, at the end of 100ns simulation time, "V1-TLR-2" and "V1-TLR-5" showed relatively higher RMSD values than the V1 and "V1-TLR-4" complexes (Fig 9A). By using RMSF, the variation of the V1, "V1-TLR-2", "V1-TLR-4", and "V1-TLR-5" complexes were examined. After 100 ns simulation times, the RMSF values of these complexes were calculated to remain below 1 nm. However, the RMSF of the "V1-TLR-2" and "V1-TLR-4" fluctuated more than that of the V1 and "V1-TLR-5" throughout the simulation run (Fig 9B).

The Rg is a metric used to assess the density of a protein. A consistent Rg number indicates a protein's stable folding, whereas a greater Rg profile signifies less stiffness in the biological system. The Rg values of the "V1-TLR-2" and "V1-TLR-4" complexes fluctuated steadily over

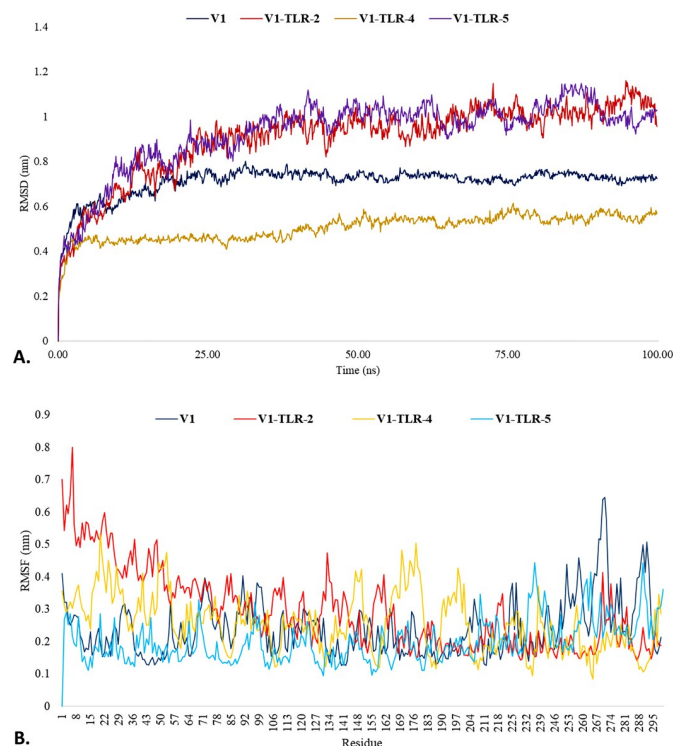

**Fig 9. Graphical representation of the molecular dynamic simulation study.** The RMSD (A) and RMSF (B) of the V1, "V1-TLR-2", "V1-TLR-4", and "V1-TLR-5" were depicted with the respective colors.

<https://doi.org/10.1371/journal.pone.0310398.g009>

simulation time. While the Rg values of the V1 and "V1-TLR-5" fluctuated abruptly, as seen in, but the values declined after 100ns simulation time (S5A Fig). SASA is employed in molecular dynamic simulations to forecast how much a protein's hydrophobic core is exposed to solvents. Higher SASA values indicate that a large portion of the protein is in contact with water. In contrast, lower values suggest that most protein is inside the hydrophobic core. After 100ns, the SASA values of the V1, "V1-TLR-2", "V1-TLR-4", and "V1-TLR-5" complexes were consistent and did not exhibit any significant variations throughout the simulation, which led to a further decrease in interest (S5B Fig).

### 3.11 MMGBSA

For the MMGBSA analysis, we used the HawkDock server. The "V1-TLR-2" complex had scores of 590.43 kcal/mol for  $\Delta$ VDWAALS, -895.88 kcal/mol for  $\Delta$ EEL, 993.75 kcal/mol for  $\Delta$ EGB, and -30.94 kcal/mol for  $\Delta$ ESURF, as revealed by the server. These interactions resulted in a total binding ( $\Delta$ TOTAL) free energy of 657.36 kcal/mol (Table 5). The server also reported that the "V1-TLR-4" complex exhibited the following scores: -187.96 kcal/mol for  $\Delta$ VDWAALS, -2397.86 kcal/mol for  $\Delta$ EEL, 2499.32 kcal/mol for  $\Delta$ EGB, and -24.56 kcal/mol

**Table 5. The MMGBSA analysis of the docked complexes.**

| Complex  | $\Delta$ VDWAALS (kcal/mol) | $\Delta$ EEL (kcal/mol) | $\Delta$ EGB (kcal/mol) | $\Delta$ ESURF (kcal/mol) | $\Delta$ TOTAL (kcal/mol) |
|----------|-----------------------------|-------------------------|-------------------------|---------------------------|---------------------------|
| V1-TLR-2 | 590.43                      | -895.88                 | 993.75                  | -30.94                    | 657.36                    |
| V1-TLR-4 | -187.96                     | -2397.86                | 2499.32                 | -24.56                    | -111.07                   |
| V1-TLR-5 | -243.33                     | -1628.04                | 1733.78                 | -35.93                    | -173.52                   |

<https://doi.org/10.1371/journal.pone.0310398.t005>

for  $\Delta$ ESURF. These values resulted in a total binding ( $\Delta$ TOTAL) free energy of -111.07 kcal/mol (Table 5). Within the "V1-TLR-5" complex, the anticipated MM-GBSA values for  $\Delta$ VDWAALS,  $\Delta$ EEL,  $\Delta$ EGB, and  $\Delta$ ESURF were -243.33 kcal/mol, -1628.04 kcal/mol, 1733.78 kcal/mol, and -35.93 kcal/mol, respectively, with a total binding free energy of -173.52 kcal/mol (Table 5).

### 3.12 MMPBSA

During this analysis, the "V1-TLR-2" complex exhibited scores of 55.83 kcal/mol for  $\Delta$ VDWAALS, -733.34 kcal/mol for  $\Delta$ EEL, 889.62 kcal/mol for  $\Delta$ EGB, and -21.28 kcal/mol for  $\Delta$ ESURF. The interactions led to a total binding free energy of 122.21 kcal/mol (Table 6). A further report from the server indicated that the complex referred to as "V1-TLR-4" had the following scores: -211.98 kcal/mol for  $\Delta$ VDWAALS, -2159.87 kcal/mol for  $\Delta$ EEL, 2277.69 kcal/mol for  $\Delta$ EGB, and -38.21 kcal/mol for  $\Delta$ ESURF. The total binding ( $\Delta$ TOTAL) free energy was calculated to be -132.37 kcal/mol as a consequence of these results (Table 6). In the "V1-TLR-5" complex, MMPBSA values for  $\Delta$ VDWAALS,  $\Delta$ EEL,  $\Delta$ EGB, and  $\Delta$ ESURF were -118.93, -1233.56, 1453.66, and -11.79 kcal/mol, respectively, with a total binding free energy of -89.38 kcal/mol (Table 6).

### 3.13 Codon optimization and *in silico* cloning

The codon optimization of the V1 was performed using the JCat server with *E. coli* strain K12. This resulted in an optimized codon sequence with 1194 nucleotide lengths (Fig 9). The optimized sequence's CAI value and GC content were 0.95 and 51.59%, respectively. The optimized vaccine sequence was then inserted into the plasmid vector pET-28a(+), creating a cloned vaccine with lengths of 6550 bp (Fig 10).

### 3.14 Immune simulation

There was a notable increase in B-cell presence, especially memory B-cells, on the first, 28th, and 56th days following immunization. Each B-cell produced immunity that was found to be highly durable, lasting nearly a year. A high expression level indicated the early immunological responses (Fig 11). Furthermore, the vaccination activated T cells, specifically T helper cells (TH cells) and cytotoxic T cells (TC cells). The research also revealed that at day 60 post-vaccination, there was a notable rise in the expression of memory TH and active TH cells, which later declined over time (Fig 12). Furthermore, it was observed that memory cytotoxic T cell (TC) and active TC cell expression were at their peak and would persist for a very long time (Fig 13). Following a peak at day 60 post-vaccination, IgM+IgG expression steadily decreased, indicating that the initial immune response was solid and durable. The immune response persisted for two months after vaccination (Fig 14). Furthermore, the vaccination resulted in a substantial rise in the production of IFN- $\gamma$  while concurrently suppressing the expression of tumor growth factor- $\beta$  (TGF- $\beta$ ), conferring a robust immune response that persisted for two months (Fig 15).

Table 6. The MMPBSA analysis of the docked complexes.

| Complex  | $\Delta$ VDWAALS (kcal/mol) | $\Delta$ EEL (kcal/mol) | $\Delta$ EGB (kcal/mol) | $\Delta$ ESURF (kcal/mol) | $\Delta$ TOTAL (kcal/mol) |
|----------|-----------------------------|-------------------------|-------------------------|---------------------------|---------------------------|
| V1-TLR-2 | 55.38                       | -733.34                 | 889.62                  | -21.28                    | 122.21                    |
| V1-TLR-4 | -211.98                     | -2159.87                | 2277.69                 | -38.21                    | -132.37                   |
| V1-TLR-5 | -118.93                     | -1233.56                | 1453.66                 | -11.79                    | -89.38                    |

<https://doi.org/10.1371/journal.pone.0310398.t006>

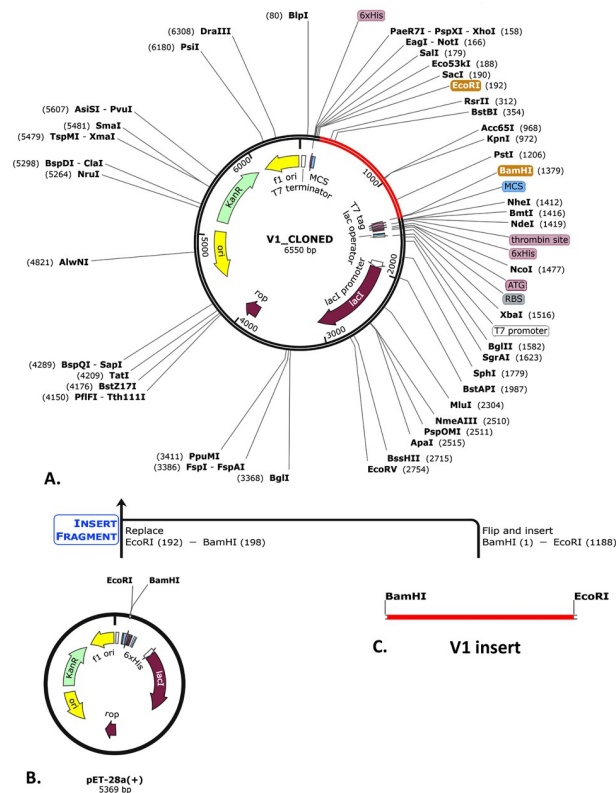

**Fig 10.** The illustration of the cloned V1 (A). Codon optimization and In silico cloning of the pET-28a(+) plasmid vector (B) with the V1 insert (C). Within the circular vector, the red part represents the V1 insert, and the black circle represents the whole vector backbone.

<https://doi.org/10.1371/journal.pone.0310398.g010>

## 4. Discussion

LF has been recognized as a neglected tropical disease by the WHO and the Centers for Disease Control and Prevention (CDC) [91]. Developing a more effective and durable preventive approach, such as a vaccine, is essential for controlling and stopping the spread of this parasitic infection [92, 93]. Over the past 50 years, research has been focused on developing a vaccine against LF [92, 94]. However, progress has been hindered by various factors, such as the

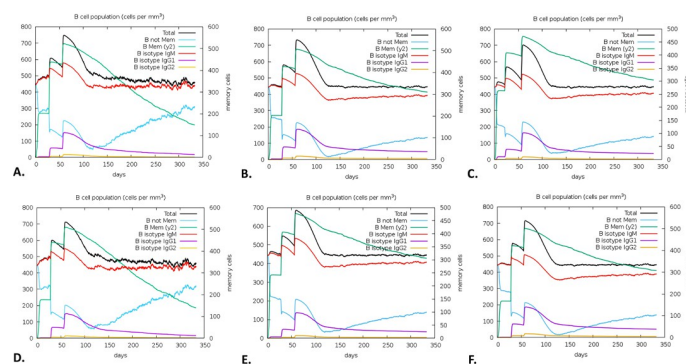

**Fig 11.** The C-ImmSim predicted the immune simulation of the V1. The evolution of B-cell among different HLA populations, including Europe (A), South, West and Central Asia (B), North and Central America (C), Oceania (D), North and East Asia (E), and South America (F).

<https://doi.org/10.1371/journal.pone.0310398.g011>

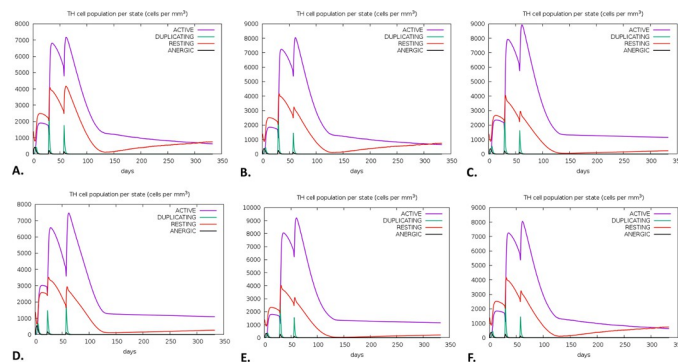

**Fig 12. The predicted immune simulation of the V1 by the C-ImmSim server.** The evolution of helper T-cell (TH) among different HLA populations, including Europe (A), South, West and Central Asia (B), North and Central America (C), Oceania (D), North and East Asia (E), and South America (F).

<https://doi.org/10.1371/journal.pone.0310398.g012>

complex life cycle of parasites, host immune responses, the lack of animal models, evidence of natural protective immunity in humans, and information on protective immune responses in humans and animals [94, 95]. Thus, this study focuses on immunoinformatics to develop a chimeric multiepitope vaccine in response to the urgent public demand for a vaccine against LF. Despite the potential, only a limited number of multiepitope vaccines against LF have been developed using this approach [24, 96–98].

Immunoinformatics is a revolutionary technology that has several advantages for developing vaccines. It relies on machine learning algorithms to rapidly sort through massive amounts of structural, genomic, and proteomic data to find potential vaccine candidates [28]. This technique enables the prediction of immune-stimulating epitopes and antigenic targets, thus enhancing the process of choosing vaccine components with improved safety and efficacy. This precision-driven approach also minimizes the need for challenging and costly clinical trials, optimizing resources and accelerating vaccine development timelines [28, 29]. Furthermore, immunoinformatics permits the development of customized vaccines that target specific pathogen strains or host populations, thereby increasing their effectiveness and adaptability in various situations. This approach promotes innovation by facilitating the investigation of novel vaccine modalities, such as nucleic acid and viral vector vaccines [18, 29]. However, several challenges must be overcome when converting immunoinformatics into vaccine manufacturing. Immunoinformatics relies on massive quantities of data, though

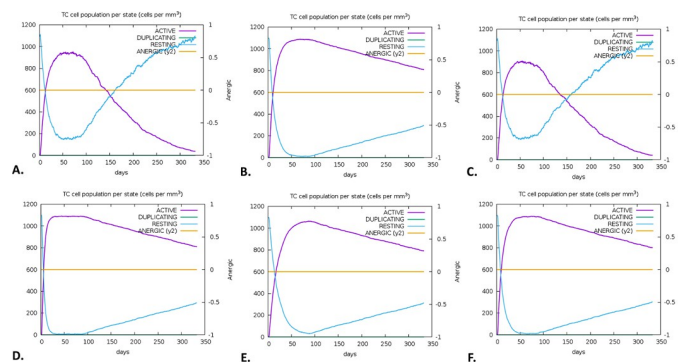

**Fig 13. The immune simulation of the V1 by the C-ImmSim server.** The evolution of cytotoxic T-cell (TC) among different HLA populations, including Europe (A), South, West and Central Asia (B), North and Central America (C), Oceania (D), North and East Asia (E), and South America (F).

<https://doi.org/10.1371/journal.pone.0310398.g013>

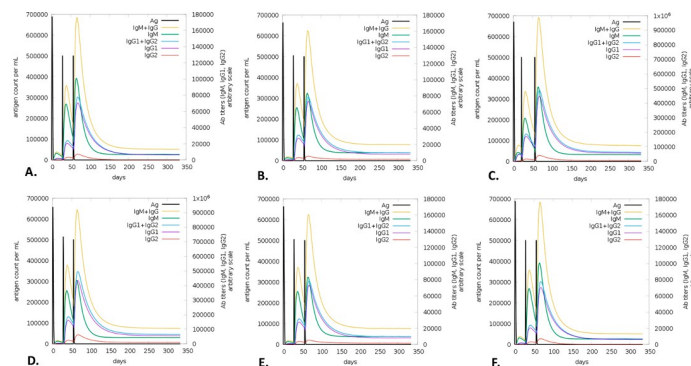

**Fig 14. The predicted immune simulation of the V1 by the C-ImmSim server.** The evolution of immunoglobulins (IgM and IgG) among different HLA populations, including Europe (A), South, West and Central Asia (B), North and Central America (C), Oceania (D), North and East Asia (E), and South America (F).

<https://doi.org/10.1371/journal.pone.0310398.g014>

variations in data quality and quantity may impact the accuracy of vaccine target predictions. Furthermore, predicted targets may not consistently generate the intended immune responses or may incite adverse reactions [18, 29]. The presence of a wide variety of mutations in the host population and the ongoing evolution of pathogens complicates the situation and may gradually reduce vaccine efficacy. Additional challenges include regulatory approval, production scalability, and cost-effectiveness, which require extensive resources and expertise [18, 29]. Realizing the promise of immunoinformatics in vaccine development will require interdisciplinary cooperation, technological developments, and persistent research efforts to meet these challenges. The present work used immunoinformatics approaches to identify thioredoxin and glutathione S-transferase proteins of the parasitic roundworm as prospective vaccination candidates from the pool of available vaccine antigens for *W. bancrofti*.

We have successfully developed two epitope-based vaccines (V1 and V2) that target the aforementioned *W. bancrofti* proteins (thioredoxin and glutathione S-transferase). We anticipated that the chosen MHC-1 and MHC-2 epitopes would exhibit a significant level of antigenicity without evidence of allergenicity and toxicity. Our predicted B-cell epitopes were also highly antigenic, with no evidence of allergenicity. In addition, B-cell epitopes are recognized as a crucial element in vaccine development since they significantly impact antigen-antibody interactions. We then used various linkers and adjuvants to construct in silico vaccines comprising the selected epitopes. However, the MW of the designed V1 and V2 were estimated to

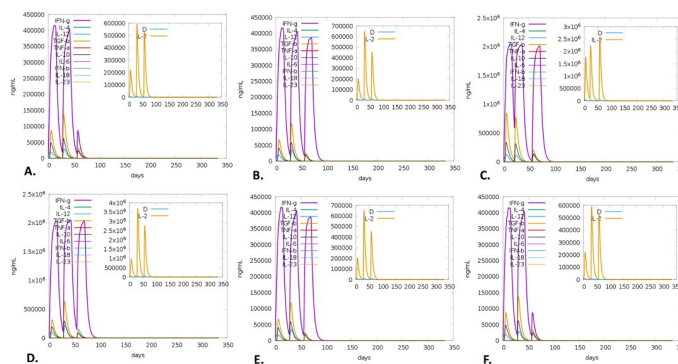

**Fig 15. C-ImmSim server predicted immune simulation of the V1.** The evolution of inflammatory cytokines among different HLA populations, including Europe (A), South, West and Central Asia (B), North and Central America (C), Oceania (D), North and East Asia (E), and South America (F).

<https://doi.org/10.1371/journal.pone.0310398.g015>

be 21534.46 Da and 1344.48 Da, respectively. Based on physicochemical properties, the V1 and V2 vaccines were predicted to be soluble proteins, which might prove functionally stable under body conditions [86, 99]. In this *in silico* vaccine construct, the solubility of the recombinant protein as assessed in overexpressed *E. coli* is essential [86]. The theoretical isoelectric point, instability index, aliphatic index, and other properties of the vaccines indicate that they are hydrophobic, consistent with reported aliphatic side chains. It is essential to comprehend how a protein folds into its secondary and tertiary structures to develop effective vaccines [100]. Subsequently, the V1 and V2 were found to have satisfactory and dependable secondary and tertiary structures. The Ramachandran plot analysis also revealed that most vaccine residues existed in the favored regions (95.6 for V1 and 96.9% for V2), indicating that the tertiary structures possessed structural integrity. The docking analyses between vaccines (V1 and V2) and human TLR-2, TLR-4, and TLR-5 using CLUSPRO 2.0 revealed the energy scores for the complexes. The lowest energy scores were observed for V1 complexes, with scores of -1248.7 (TLR-2), -1038.5 (TLR-4), and -1562.8 (TLR-5). Contrarily, V2 complexes had scores of -1004.2, -1078.5, and -1354.5, respectively. Using PyMOL and PDBsum, it was observed that V1-TLR-2 exhibited five hydrogen bonds, 19 salt bridges, and 289 non-bond interactions. Adversely, V1-TLR-4 showed four hydrogen bonds, two salt bridges, and 257 non-bond interactions. V1-TLR-5 exhibited the most significant interactions, forming many hydrogen bonds, salt bridges, and non-bond interactions. No disulfide bonds were detected in any of the complexes.

The iMODS server's NMA of "V1-TLR" and "V2-TLR" complexes provided a complete evaluation of structural integrity and alterations. According to NMA, "V1-TLR" complexes showed more structural flexibility and rigidity than the "V2-TLR" complexes, suggested by the eigenvalues of  $5.737061e-07$  (V1-TLR-2),  $5.294024e-07$  (V1-TLR-4),  $6.008857e-07$  (V1-TLR-5),  $1.209879e-07$  (V2-TLR-2),  $2.061794e-06$  (V2-TLR-4), and  $1.892946e-06$  (V2-TLR-5). Considering its exceptional tertiary structure quality and significant binding affinity for TLRs, we used V1 for further analysis. To evaluate their stability, molecular dynamic simulations were performed on V1, V1-TLR-2, V1-TLR-4, and V1-TLR-5 complexes for 100 ns. The RMSD values suggested a state of equilibrium, with V1 and V1-TLR-4 demonstrating minimal fluctuation and high stability, measuring less than 1 nm. On the other hand, V1-TLR-2 and V1-TLR-5 exhibited higher RMSD values, suggesting a greater level of rigidity. The RMSF values stayed below 1 nm, although slightly more fluctuation was observed in V1-TLR-2 and V1-TLR-4. The Rg values fluctuated consistently for V1-TLR-2 and V1-TLR-4, while the SASA values remained constant for all complexes. Using the HawkDock server for MMGBSA analysis, total binding free energies were found to be 657.36 kcal/mol for V1-TLR-2, -111.07 kcal/mol for V1-TLR-4, and -173.52 kcal/mol for V1-TLR-5, indicating varying interaction strengths. According to MMPBSA, the "V1-TLR" complexes showed the total binding free energies were 122.21 kcal/mol for V1-TLR-2, -132.37 kcal/mol for V1-TLR-4, and -89.38 kcal/mol for V1-TLR-5. The binding affinity of V1-TLR-4 was the most significant since it exhibited the lowest free energy.

Using the JCat server for *E. coli* strain K12, the V1 vaccine codon was optimized to 1194 nucleotides. The optimized sequence has a CAI of 0.95 and a GC content of 51.59%, suggesting strong expression potential. Finally, a 6550-bp vaccine was cloned by inserting the optimal sequence into the plasmid vector pET-28a(+).

Additionally, we discovered a potent and long-lasting immune response following a three-dose vaccine regimen for the V1. The rise in B-cell populations and prolonged activity of both TH and TC cells suggest the possibility of long-term adaptive immunity, providing enhanced protection against *W. bancrofti*. Finally, this study highlights how well the vaccine against *W.*

*bancrofti* elicits strong humoral and cellular immune responses. Nevertheless, this study lacks *in vitro*, *in vivo*, or clinical trials; these will be carried out in future experiments.

## 5. Conclusion

We designed two chimeric multiepitope vaccines against LF targeting the thioredoxin and glutathione S-transferase proteins of *W. bancrofti*. Based on physicochemical analysis reports, the designed vaccines demonstrated high antigenicity and stability with no evidence of allergenicity. Further, the vaccines showed strong binding affinities to human TLR receptors, as the docking analysis and NMA suggested. Compared to the V2, the V1 showed better efficacy and stability as a vaccine candidate. Hence, further analyses were carried out on the V1. Subsequently, the stability of V1 and its docked complexes was validated by the 100ns molecular dynamic simulation analysis. Besides, the codon optimization and *in silico* cloning indicated high expression levels of the V1 in *E. coli* plasmid vector pET-28a(+). Finally, the immune simulation revealed that a three-dose regimen of the vaccines elicited strong humoral and cellular immune responses, suggesting potential long-term protection. Nevertheless, this study has several limitations, like the absence of any *in vivo* or *in vitro* experiments with the subjects. These experiments will help to determine the vaccine's effectiveness in preventing infection and identify potential adverse effects on human health. Therefore, future research should focus on assessing the vaccine candidate in various cell lines or animal models. We hope this study could contribute to the complete elimination of LF globally.

## Supporting information

**S1 Fig.** Secondary structure prediction of the vaccines by GOR4 (A, B) and SOPMA (C, D) server.  
(TIF)

**S2 Fig.** The docking analysis of the "V2-TLR-2" (A), "V2-TLR-4" (B), and "V2-TLR-5" (C) complexes. The intermolecular interactions between the "V2-TLR-2" (D, G), "V2-TLR-4" (E, H), and "V2-TLR-5" (F, I) complexes are represented as different color codes. The cyan and green colors represent the TLRs and V2, respectively. The red, yellow, blue, and orange colors represent the salt bridges, disulfide, hydrogen, and non-bonded contacts, respectively.  
(TIF)

**S3 Fig. The normal mode analysis of the "V2-TLR-2", "V2-TLR-4", and "V2-TLR-5" docked complex.** The illustration depicted the deformability plots (A, B, C), eigenvalue (D, E, F), and co-variance map (G, H, I).  
(TIF)

**S4 Fig. The iMODs illustration of the "V2-TLR-2", "V2-TLR-4", and "V2-TLR-5" docked complex.** The illustration depicted the B-factor (A, B, C), variance (D, E, F), and elastic map (G, H, I).  
(TIF)

**S5 Fig. The line plot represents the molecular dynamic simulation study.** The Rg (A) and SASA (B) of the V1, "V1-TLR-2", "V1-TLR-4", and "V1-TLR-5" were depicted in different colors.  
(TIF)

**S1 Table.** Ellipro predicted the discontinuous B-cell epitopes residues of the vaccine structures.  
(DOCX)

## Acknowledgments

The authors like to acknowledge the Department of Pathology and Parasitology and Department of Genomics and Bioinformatics, Chittagong Veterinary and Animal Sciences University (CVASU) for the technical support of the project.

## Author Contributions

**Conceptualization:** Md. Habib Ullah Masum.

**Data curation:** Rehana Parvin, Md. Habib Ullah Masum.

**Formal analysis:** Rehana Parvin, Md. Habib Ullah Masum.

**Funding acquisition:** Md. Habib Ullah Masum.

**Investigation:** Md. Habib Ullah Masum, Jannatul Ferdous.

**Methodology:** Rehana Parvin, Md. Habib Ullah Masum, Jannatul Ferdous, Ahmad Abdullah Mahdeen.

**Project administration:** Md. Habib Ullah Masum.

**Resources:** Md. Habib Ullah Masum.

**Software:** Rehana Parvin, Md. Habib Ullah Masum, Ahmad Abdullah Mahdeen.

**Supervision:** Md. Habib Ullah Masum, Md. Shafiqul Islam Khan.

**Validation:** Rehana Parvin, Md. Habib Ullah Masum.

**Visualization:** Md. Habib Ullah Masum, Ahmad Abdullah Mahdeen.

**Writing – original draft:** Rehana Parvin, Md. Habib Ullah Masum.

**Writing – review & editing:** Rehana Parvin, Md. Habib Ullah Masum, Jannatul Ferdous, Md. Shafiqul Islam Khan.

## References

1. Das NC, Ray AS, Bayry J, Mukherjee S. Therapeutic Efficacy of Anti-Bestrophin Antibodies against Experimental Filariasis: Immunological, Immune-Informatics and Immune Simulation Investigations. *Antibodies* (Basel, Switzerland). 2021; 10(2). <https://doi.org/10.3390/antib10020014> PMID: 33920596
2. Organization WH. Lymphatic filariasis 2023 [Available from: <https://www.who.int/news-room/fact-sheets/detail/lymphatic-filariasis>.
3. Mukherjee S, Mukherjee N, Saini P, Gayen P, Roy P, Sinha Babu SP. Molecular evidence on the occurrence of co-infection with *Pichia guilliermondii* and *Wuchereria bancrofti* in two filarial endemic districts of India. *Infectious diseases of poverty*. 2014; 3(1):13. <https://doi.org/10.1186/2049-9957-3-13> PMID: 24708881
4. Mukherjee S, Mukherjee S, Bhattacharya S, Sinha Babu SP. Surface proteins of *Setaria cervi* induce inflammation in macrophage through Toll-like receptor 4 (TLR4)-mediated signalling pathway. *Parasite immunology*. 2017; 39(1). <https://doi.org/10.1111/pim.12389> PMID: 27659561
5. Mukherjee S, Huda S, Sinha Babu SP. Toll-like receptor polymorphism in host immune response to infectious diseases: A review. 2019; 90(1):e12771.
6. Das NC, Sen Gupta PS, Biswal S, Patra R, Rana MK, Mukherjee S. In-silico evidences on filarial cystatin as a putative ligand of human TLR4. *Journal of biomolecular structure & dynamics*. 2022; 40(19):8808–24. <https://doi.org/10.1080/07391102.2021.1918252> PMID: 33955317
7. mondiale de la Santé O, hebdomadaire WHOJWERRé. Global programme to eliminate lymphatic filariasis: progress report, 2015. 2016;91(39):441–55.
8. Medeiros ZM, Vieira AVB, Xavier AT, Bezerra GSN, Lopes MFC, Bonfim CV, et al. Lymphatic Filariasis: A Systematic Review on Morbidity and Its Repercussions in Countries in the Americas. *International journal of environmental research and public health*. 2021; 19(1). <https://doi.org/10.3390/ijerph19010316> PMID: 35010576

9. Bizhani N, Hashemi Hafshejani S, Mohammadi N, Rezaei M, Rokni MB. Lymphatic filariasis in Asia: a systematic review and meta-analysis. *Parasitology Research*. 2021; 120(2):411–22. <https://doi.org/10.1007/s00436-020-06991-y> PMID: 33415391
10. Hotez PJ, Ehrenberg JP. Escalating the global fight against neglected tropical diseases through interventions in the Asia Pacific region. *Advances in parasitology*. 2010; 72:31–53. [https://doi.org/10.1016/S0065-308X\(10\)72002-9](https://doi.org/10.1016/S0065-308X(10)72002-9) PMID: 20624527
11. Utzinger J, Bergquist R, Olveda R, Zhou XN. Important helminth infections in Southeast Asia diversity, potential for control and prospects for elimination. *Advances in parasitology*. 2010; 72:1–30. [https://doi.org/10.1016/S0065-308X\(10\)72001-7](https://doi.org/10.1016/S0065-308X(10)72001-7) PMID: 20624526
12. Ottesen EA. Lymphatic Filariasis: Treatment, Control and Elimination. In: Molyneux DH, editor. *Advances in parasitology*. 61: Academic Press; 2006. p. 395–441. [https://doi.org/10.1016/S0065-308X\(05\)61010-X](https://doi.org/10.1016/S0065-308X(05)61010-X) PMID: 16735170
13. Ichimori K, King JD, Engels D, Yajima A, Mikhailov A, Lammie P, et al. Global Programme to Eliminate Lymphatic Filariasis: The Processes Underlying Programme Success. *PLOS Neglected Tropical Diseases*. 2014; 8(12):e3328. <https://doi.org/10.1371/journal.pntd.0003328> PMID: 25502758
14. King CLJPi. Transmission intensity and human immune responses to lymphatic filariasis. 2001;23 (7):363–71.
15. Ramesh A, Small ST, Kloos ZA, Kazura JW, Nutman TB, Serre D, et al. The complete mitochondrial genome sequence of the filarial nematode *Wuchereria bancrofti* from three geographic isolates provides evidence of complex demographic history. *Molecular and biochemical parasitology*. 2012; 183 (1):32–41. <https://doi.org/10.1016/j.molbiopara.2012.01.004> PMID: 22326389
16. Combet C, Blanchet C, Geourjon C, Deléage G. NPS@: network protein sequence analysis. *Trends in biochemical sciences*. 2000; 25(3):147–50. [https://doi.org/10.1016/S0968-0004\(99\)01540-6](https://doi.org/10.1016/S0968-0004(99)01540-6) PMID: 10694887
17. Jones DT. Protein secondary structure prediction based on position-specific scoring matrices. *Journal of molecular biology*. 1999; 292(2):195–202. <https://doi.org/10.1006/jmbi.1999.3091> PMID: 10493868
18. Joon S, Singla RK, Shen B. Vaccines and Immunoinformatics for Vaccine Design. In: Shen B, editor. *Translational Informatics: Prevention and Treatment of Viral Infections*. Singapore: Springer Nature Singapore; 2022. p. 95–110.
19. Addiss DG. Global elimination of lymphatic filariasis: addressing the public health problem. *PLoS Negl Trop Dis*. 2010; 4(6):e741. <https://doi.org/10.1371/journal.pntd.0000741> PMID: 20614015
20. Kabatereine NB, Malecela M, Lado M, Zaramba S, Amiel O, Kolaczinski JH. How to (or not to) integrate vertical programmes for the control of major neglected tropical diseases in sub-Saharan Africa. *PLoS Negl Trop Dis*. 2010; 4(6):e755. <https://doi.org/10.1371/journal.pntd.0000755> PMID: 20614017
21. Al-Shaham AA, Sood S. Recurrent furunculosis as a cause of isolated penile lymphedema: a case report. *Journal of medical case reports*. 2010; 4:196. <https://doi.org/10.1186/1752-1947-4-196> PMID: 20584337
22. Anugraha G, Madhumathi J, Prince PR, Prita PJ, Khatri VK, Amdare NP, et al. Chimeric Epitope Vaccine from Multistage Antigens for Lymphatic Filariasis. *Scandinavian journal of immunology*. 2015; 82 (4):380–9. <https://doi.org/10.1111/sji.12340> PMID: 26179420
23. Anugraha G, Madhumathi J, Jeya Prita PJ, Kaliraj P. Biodegradable poly-L-lactide based microparticles as controlled release delivery system for filarial vaccine candidate antigens. *European journal of pharmacology*. 2015; 747:174–80. <https://doi.org/10.1016/j.ejphar.2014.12.004> PMID: 25514604
24. Gorai S, Das NC, Gupta PSS, Panda SK, Rana MK, Mukherjee S. Designing efficient multi-epitope peptide-based vaccine by targeting the antioxidant thioredoxin of bancroftian filarial parasite. *Infection, Genetics and Evolution*. 2022; 98:105237. <https://doi.org/10.1016/j.meegid.2022.105237> PMID: 35131521
25. Keating J, Yukich JO, Mollenkopf S, Tediosi F. Lymphatic filariasis and onchocerciasis prevention, treatment, and control costs across diverse settings: A systematic review. *Acta Tropica*. 2014; 135:86–95. <https://doi.org/10.1016/j.actatropica.2014.03.017> PMID: 24699086
26. Houston R. Salt fortified with diethylcarbamazine (DEC) as an effective intervention for lymphatic filariasis, with lessons learned from salt iodization programmes. *Parasitology*. 2000; 121(S1):S161–S73. <https://doi.org/10.1017/S0031182000007150> PMID: 11386687
27. Anand SB, Rajagopal V, Kaliraj P. Brugia malayi thioredoxin peroxidase as a potential vaccine candidate antigen for lymphatic filariasis. *Applied biochemistry and biotechnology*. 2012; 167(5):1351–64. <https://doi.org/10.1007/s12010-012-9643-6> PMID: 22528648
28. Rawat SS, Keshri AK, Kaur R, Prasad A. Immunoinformatics Approaches for Vaccine Design: A Fast and Secure Strategy for Successful Vaccine Development. *Vaccines*. 2023; 11(2). <https://doi.org/10.3390/vaccines11020221> PMID: 36851099

29. Oli AN, Obialor WO, Ifeanyichukwu MO, Odimegwu DC, Okoyeh JN, Emechebe GO, et al. Immunoinformatics and Vaccine Development: An Overview. *ImmunoTargets and therapy*. 2020; 9:13–30. <https://doi.org/10.2147/ITT.S241064> PMID: 32161726
30. Joardar N, Sinha Babu SP. A review on the druggability of a thiol-based enzymatic antioxidant thioredoxin reductase for treating filariasis and other parasitic infections. *International Journal of Biological Macromolecules*. 2020; 142:125–41. <https://doi.org/10.1016/j.ijbiomac.2019.09.083> PMID: 31521661
31. Veerapathran A, Dakshinamoorthy G, Gnanasekar M, Reddy MVR, Kalyanasundaram R. Evaluation of *Wuchereria bancrofti* GST as a Vaccine Candidate for Lymphatic Filariasis. *PLOS Neglected Tropical Diseases*. 2009; 3(6):e457. <https://doi.org/10.1371/journal.pntd.0000457> PMID: 19513102
32. Immanuel C, Ramanathan A, Balasubramanian M, Khatri VK, Amdare NP, Rao DN, et al. Immunoprophylaxis of multi-antigen peptide (MAP) vaccine for human lymphatic filariasis. *Immunologic Research*. 2017; 65(3):729–38. <https://doi.org/10.1007/s12026-017-8911-5> PMID: 28432603
33. Sayers EW, Bolton EE, Brister JR, Canese K, Chan J, Comeau DC, et al. Database resources of the national center for biotechnology information. *Nucleic acids research*. 2022; 50(D1):D20–d6. <https://doi.org/10.1093/nar/gkab1112> PMID: 34850941
34. Jurtz V, Paul S, Andreatta M, Marcatili P, Peters B, Nielsen M. NetMHCpan-4.0: Improved Peptide-MHC Class I Interaction Predictions Integrating Eluted Ligand and Peptide Binding Affinity Data. *Journal of immunology (Baltimore, Md : 1950)*. 2017; 199(9):3360–8. <https://doi.org/10.4049/jimmunol.1700893> PMID: 28978689
35. Reynisson B, Alvarez B, Paul S, Peters B, Nielsen M. NetMHCpan-4.1 and NetMHCIIpan-4.0: improved predictions of MHC antigen presentation by concurrent motif deconvolution and integration of MS MHC eluted ligand data. *Nucleic acids research*. 2020; 48(W1):W449–w54. <https://doi.org/10.1093/nar/gkaa379> PMID: 32406916
36. Andreatta M, Nielsen M. Gapped sequence alignment using artificial neural networks: application to the MHC class I system. *Bioinformatics (Oxford, England)*. 2016; 32(4):511–7. <https://doi.org/10.1093/bioinformatics/btv639> PMID: 26515819
37. Nielsen M, Lundegaard C, Worning P, Lauemøller SL, Lamberth K, Buus S, et al. Reliable prediction of T-cell epitopes using neural networks with novel sequence representations. *Protein science : a publication of the Protein Society*. 2003; 12(5):1007–17. <https://doi.org/10.1110/ps.0239403> PMID: 12717023
38. Reynisson B, Barra C, Kaabinejad S, Hildebrand WH, Peters B, Nielsen M. Improved Prediction of MHC II Antigen Presentation through Integration and Motif Deconvolution of Mass Spectrometry MHC Eluted Ligand Data. *Journal of proteome research*. 2020; 19(6):2304–15. <https://doi.org/10.1021/acs.jproteome.9b00874> PMID: 32308001
39. Singh H, Ansari HR, Raghava GP. Improved method for linear B-cell epitope prediction using antigen's primary sequence. *PloS one*. 2013; 8(5):e62216. <https://doi.org/10.1371/journal.pone.0062216> PMID: 23667458
40. Doytchinova IA, Flower DR. VaxiJen: a server for prediction of protective antigens, tumour antigens and subunit vaccines. *BMC bioinformatics*. 2007; 8:4. <https://doi.org/10.1186/1471-2105-8-4> PMID: 17207271
41. Dimitrov I, Bangov I, Flower DR, Doytchinova I. AllerTOP v.2—a server for in silico prediction of allergens. *Journal of molecular modeling*. 2014; 20(6):2278. <https://doi.org/10.1007/s00894-014-2278-5> PMID: 24878803
42. Sharma N, Naorem LD, Jain S, Raghava GPS. ToxinPred2: an improved method for predicting toxicity of proteins. *Briefings in bioinformatics*. 2022; 23(5). <https://doi.org/10.1093/bib/bbac174> PMID: 35595541
43. Adhikari UK, Rahman MM. Overlapping CD8+ and CD4+ T-cell epitopes identification for the progression of epitope-based peptide vaccine from nucleocapsid and glycoprotein of emerging Rift Valley fever virus using immunoinformatics approach. *Infection, genetics and evolution : journal of molecular epidemiology and evolutionary genetics in infectious diseases*. 2017; 56:75–91. <https://doi.org/10.1016/j.meegid.2017.10.022> PMID: 29107145
44. Adhikari UK, Tayebi M, Rahman MM. Immunoinformatics Approach for Epitope-Based Peptide Vaccine Design and Active Site Prediction against Polyprotein of Emerging Oropouche Virus. *Journal of immunology research*. 2018; 2018:6718083. <https://doi.org/10.1155/2018/6718083> PMID: 30402510
45. Bui HH, Sidney J, Dinh K, Southwood S, Newman MJ, Sette A. Predicting population coverage of T-cell epitope-based diagnostics and vaccines. *BMC bioinformatics*. 2006; 7:153. <https://doi.org/10.1186/1471-2105-7-153> PMID: 16545123
46. Wilkins MR, Gasteiger E, Bairoch A, Sanchez JC, Williams KL, Appel RD, et al. Protein identification and analysis tools in the ExPASy server. *Methods in molecular biology (Clifton, NJ)*. 1999; 112:531–52. <https://doi.org/10.1385/1-59259-584-7:531> PMID: 10027275

47. Magnan CN, Randall A, Baldi P. SOLpro: accurate sequence-based prediction of protein solubility. *Bioinformatics* (Oxford, England). 2009; 25(17):2200–7. <https://doi.org/10.1093/bioinformatics/btp386> PMID: 19549632
48. Saha S, Raghava GP. AlgPred: prediction of allergenic proteins and mapping of IgE epitopes. *Nucleic acids research*. 2006; 34(Web Server issue):W202–9. <https://doi.org/10.1093/nar/gkl343> PMID: 16844994
49. Dhanda SK, Vir P, Raghava GP. Designing of interferon-gamma inducing MHC class-II binders. *Biology direct*. 2013; 8:30. <https://doi.org/10.1186/1745-6150-8-30> PMID: 24304645
50. Buchan DWA, Jones DT. The PSIPRED Protein Analysis Workbench: 20 years on. *Nucleic acids research*. 2019; 47(W1):W402–w7. <https://doi.org/10.1093/nar/gkz297> PMID: 31251384
51. Geourjon C, Deléage G. SOPMA: significant improvements in protein secondary structure prediction by consensus prediction from multiple alignments. *Computer applications in the biosciences : CABIOS*. 1995; 11(6):681–4. <https://doi.org/10.1093/bioinformatics/11.6.681> PMID: 8808585
52. Cheng J, Randall AZ, Sweredoski MJ, Baldi P. SCRATCH: a protein structure and structural feature prediction server. *Nucleic acids research*. 2005; 33(Web Server issue):W72–6. <https://doi.org/10.1093/nar/gki396> PMID: 15980571
53. Ko J, Park H, Heo L, Seok C. GalaxyWEB server for protein structure prediction and refinement. *Nucleic acids research*. 2012; 40(Web Server issue):W294–7. <https://doi.org/10.1093/nar/gks493> PMID: 22649060
54. Laskowski R, MacArthur MW, Moss DS, Thornton J. PROCHECK: A program to check the stereochemical quality of protein structures. *Journal of Applied Crystallography*. 1993; 26:283–91.
55. Laskowski RA, MacArthur MW, Thornton JMJ. PROCHECK: validation of protein-structure coordinates. 2012:684–7.
56. Laskowski RA, Rullmann JA, MacArthur MW, Kaptein R, Thornton JM. AQUA and PROCHECK-NMR: programs for checking the quality of protein structures solved by NMR. *Journal of biomolecular NMR*. 1996; 8(4):477–86. <https://doi.org/10.1007/BF00228148> PMID: 9008363
57. Morris AL, MacArthur MW, Hutchinson EG, Thornton JM. Stereochemical quality of protein structure coordinates. *Proteins*. 1992; 12(4):345–64. <https://doi.org/10.1002/prot.340120407> PMID: 1579569
58. Sippl MJ. Recognition of errors in three-dimensional structures of proteins. *Proteins*. 1993; 17(4):355–62. <https://doi.org/10.1002/prot.340170404> PMID: 8108378
59. Wiederstein M, Sippl MJ. ProSA-web: interactive web service for the recognition of errors in three-dimensional structures of proteins. *Nucleic acids research*. 2007; 35(Web Server issue):W407–10. <https://doi.org/10.1093/nar/gkm290> PMID: 17517781
60. Ayyagari VS. Design of Linear B Cell Epitopes and Evaluation of Their Antigenicity, Allergenicity, and Toxicity: An Immunoinformatics Approach. In: Reche PA, editor. *Computational Vaccine Design*. New York, NY: Springer US; 2023. p. 197–209.
61. Ponomarenko J, Bui HH, Li W, Fusseder N, Bourne PE, Sette A, et al. ElliPro: a new structure-based tool for the prediction of antibody epitopes. *BMC bioinformatics*. 2008; 9:514. <https://doi.org/10.1186/1471-2105-9-514> PMID: 19055730
62. Desta IT, Porter KA, Xia B, Kozakov D, Vajda S. Performance and Its Limits in Rigid Body Protein-Protein Docking. *Structure* (London, England : 1993). 2020; 28(9):1071–81.e3. <https://doi.org/10.1016/j.str.2020.06.006> PMID: 32649857
63. Kozakov D, Beglov D, Bohnuud T, Mottarella SE, Xia B, Hall DR, et al. How good is automated protein docking? *Proteins*. 2013; 81(12):2159–66. <https://doi.org/10.1002/prot.24403> PMID: 23996272
64. Kozakov D, Hall DR, Xia B, Porter KA, Padhorny D, Yueh C, et al. The ClusPro web server for protein-protein docking. *Nature protocols*. 2017; 12(2):255–78. <https://doi.org/10.1038/nprot.2016.169> PMID: 28079879
65. Vajda S, Yueh C, Beglov D, Bohnuud T, Mottarella SE, Xia B, et al. New additions to the ClusPro server motivated by CAPRI. *Proteins*. 2017; 85(3):435–44. <https://doi.org/10.1002/prot.25219> PMID: 27936493
66. Das NC, Gorai S, Gupta PSS, Panda SK, Rana MK, Mukherjee S. Immune targeting of filarial glutaredoxin through a multi-epitope peptide-based vaccine: A reverse vaccinology approach. *International Immunopharmacology*. 2024; 133:112120. <https://doi.org/10.1016/j.intimp.2024.112120> PMID: 38657497
67. Das NC, Patra R, Gupta PSS, Ghosh P, Bhattacharya M, Rana MK, et al. Designing of a novel multi-epitope peptide based vaccine against *Brugia malayi*: An in silico approach. *Infection, Genetics and Evolution*. 2021; 87:104633. <https://doi.org/10.1016/j.meegid.2020.104633> PMID: 33181335
68. Das NC, Gupta PSS, Panda SK, Rana MK, Mukherjee S. Reverse vaccinology assisted design of a novel multi-epitope vaccine to target *Wuchereria bancrofti* cystatin: An immunoinformatics approach.

- International Immunopharmacology. 2023; 115:109639. <https://doi.org/10.1016/j.intimp.2022.109639> PMID: 36586276
69. Laskowski RA, Jabłońska J, Pravda L, Vařeková RS, Thornton JM. PDBsum: Structural summaries of PDB entries. *Protein science : a publication of the Protein Society*. 2018; 27(1):129–34. <https://doi.org/10.1002/pro.3289> PMID: 28875543
70. Ma J. Usefulness and limitations of normal mode analysis in modeling dynamics of biomolecular complexes. *Structure (London, England : 1993)*. 2005; 13(3):373–80. <https://doi.org/10.1016/j.str.2005.02.002> PMID: 15766538
71. Dykeman EC, Sankey OF. Normal mode analysis and applications in biological physics. *Journal of physics Condensed matter : an Institute of Physics journal*. 2010; 22(42):423202. <https://doi.org/10.1088/0953-8984/22/42/423202> PMID: 21403307
72. López-Blanco JR, Aliaga JI, Quintana-Ortí ES, Chacón P. iMODS: internal coordinates normal mode analysis server. *Nucleic acids research*. 2014; 42(Web Server issue):W271–6. <https://doi.org/10.1093/nar/gku339> PMID: 24771341
73. Song LF, Lee TS, Zhu C, York DM, Merz KM, Jr., Using AMBER18 for Relative Free Energy Calculations. *Journal of chemical information and modeling*. 2019; 59(7):3128–35. <https://doi.org/10.1021/acs.jcim.9b00105> PMID: 31244091
74. Tian C, Kasavajhala K, Belfon KAA, Raguette L, Huang H, Migués AN, et al. ff19SB: Amino-Acid-Specific Protein Backbone Parameters Trained against Quantum Mechanics Energy Surfaces in Solution. *Journal of chemical theory and computation*. 2020; 16(1):528–52. <https://doi.org/10.1021/acs.jctc.9b00591> PMID: 31714766
75. Sengupta A, Li Z, Song LF, Li P, Merz KM, Jr., Parameterization of Monovalent Ions for the OPC3, OPC, TIP3P-FB, and TIP4P-FB Water Models. *Journal of chemical information and modeling*. 2021; 61(2):869–80. <https://doi.org/10.1021/acs.jcim.0c01390> PMID: 33538599
76. Izadi S, Anandakrishnan R, Onufriev AV. Building Water Models: A Different Approach. *The journal of physical chemistry letters*. 2014; 5(21):3863–71. <https://doi.org/10.1021/jz501780a> PMID: 25400877
77. Ebbinghaus S, Kim SJ, Heyden M, Yu X, Heugen U, Gruebele M, et al. An extended dynamical hydration shell around proteins. *Proceedings of the National Academy of Sciences of the United States of America*. 2007; 104(52):20749–52. <https://doi.org/10.1073/pnas.0709207104> PMID: 18093918
78. Salomon-Ferrer R, Götz AW, Poole D, Le Grand S, Walker RC. Routine Microsecond Molecular Dynamics Simulations with AMBER on GPUs. 2. Explicit Solvent Particle Mesh Ewald. *Journal of chemical theory and computation*. 2013; 9(9):3878–88.
79. Götz AW, Williamson MJ, Xu D, Poole D, Le Grand S, Walker RC. Routine Microsecond Molecular Dynamics Simulations with AMBER on GPUs. 1. Generalized Born. *Journal of chemical theory and computation*. 2012; 8(5):1542–55.
80. Chen F, Sun H, Wang J, Zhu F, Liu H, Wang Z, et al. Assessing the performance of MM/PBSA and MM/GBSA methods. 8. Predicting binding free energies and poses of protein-RNA complexes. *RNA (New York, NY)*. 2018; 24(9):1183–94. <https://doi.org/10.1261/rna.065896.118> PMID: 29930024
81. Hou T, Wang J, Li Y, Wang W. Assessing the performance of the MM/PBSA and MM/GBSA methods. 1. The accuracy of binding free energy calculations based on molecular dynamics simulations. *Journal of chemical information and modeling*. 2011; 51(1):69–82. <https://doi.org/10.1021/ci100275a> PMID: 21117705
82. Sun H, Li Y, Tian S, Xu L, Hou T. Assessing the performance of MM/PBSA and MM/GBSA methods. 4. Accuracies of MM/PBSA and MM/GBSA methodologies evaluated by various simulation protocols using PDBbind data set. *Physical chemistry chemical physics : PCCP*. 2014; 16(31):16719–29. <https://doi.org/10.1039/c4cp01388c> PMID: 24999761
83. Weng G, Wang E, Wang Z, Liu H, Zhu F, Li D, et al. HawkDock: a web server to predict and analyze the protein–protein complex based on computational docking and MM/GBSA. *Nucleic acids research*. 2019; 47(W1):W322–W30. <https://doi.org/10.1093/nar/gkz397> PMID: 31106357
84. Miller BR, 3rd, McGee TD, Jr., Swails JM, Homeyer N, Gohlke H, Roitberg AE. MMPBSA.py: An Efficient Program for End-State Free Energy Calculations. *Journal of chemical theory and computation*. 2012; 8(9):3314–21.
85. Ali M, Pandey RK, Khatoon N, Narula A, Mishra A, Prajapati VK. Exploring dengue genome to construct a multi-epitope based subunit vaccine by utilizing immunoinformatics approach to battle against dengue infection. *Scientific reports*. 2017; 7(1):9232. <https://doi.org/10.1038/s41598-017-09199-w> PMID: 28835708
86. Bibi S, Ullah I, Zhu B, Adnan M, Liaqat R, Kong WB, et al. In silico analysis of epitope-based vaccine candidate against tuberculosis using reverse vaccinology. *Scientific reports*. 2021; 11(1):1249. <https://doi.org/10.1038/s41598-020-80899-6> PMID: 33441913

87. Rapin N, Lund O, Bernaschi M, Castiglione F. Computational immunology meets bioinformatics: the use of prediction tools for molecular binding in the simulation of the immune system. *PloS one*. 2010; 5(4):e9862. <https://doi.org/10.1371/journal.pone.0009862> PMID: 20419125
88. Dong R, Chu Z, Yu F, Zha Y. Contriving Multi-Epitope Subunit of Vaccine for COVID-19: Immunoinformatics Approaches. 2020; 11.
89. Li W, Joshi MD, Singhanian S, Ramsey KH, Murthy AK. Peptide Vaccine: Progress and Challenges. 2014; 2(3):515–36.
90. Chao P, Zhang X, Zhang L, Yang A, Wang Y, Chen X. Proteomics-based vaccine targets annotation and design of multi-epitope vaccine against antibiotic-resistant *Streptococcus gallolyticus*. *Scientific reports*. 2024; 14(1):4836. <https://doi.org/10.1038/s41598-024-55372-3> PMID: 38418560
91. Chavda VP, Pandya A, Pulakkat S, Soniwala M, Patravale V. Lymphatic filariasis vaccine development: neglected for how long? Expert review of vaccines. 2021; 20(11):1471–82. <https://doi.org/10.1080/14760584.2021.1990760> PMID: 34633881
92. BABAYAN SA, ALLEN JE, TAYLOR DW. Future prospects and challenges of vaccines against filariasis. 2012;34(5):243–53.
93. Kalyanasundaram R, Khatri V, Chauhan N. Advances in Vaccine Development for Human Lymphatic Filariasis. *Trends in Parasitology*. 2020; 36(2):195–205. <https://doi.org/10.1016/j.pt.2019.11.005> PMID: 31864894
94. Morris CP, Evans H, Larsen Sasha E, Mitre E. A Comprehensive, Model-Based Review of Vaccine and Repeat Infection Trials for Filariasis. *Clinical Microbiology Reviews*. 2013; 26(3):381–421. <https://doi.org/10.1128/CMR.00002-13> PMID: 23824365
95. Paciorewski N, Porte P, Shultz LD, Rajan TV. B1 B Lymphocytes Play a Critical Role in Host Protection against Lymphatic Filarial Parasites. *Journal of Experimental Medicine*. 2000; 191(4):731–6. <https://doi.org/10.1084/jem.191.4.731> PMID: 10684864
96. Madanagopal P, Muthusamy S, Pradhan SN, Prince PR. Construction and validation of a multi-epitope in silico vaccine model for lymphatic filariasis by targeting *Brugia malayi*: a reverse vaccinology approach. *Bulletin of the National Research Centre*. 2023; 47(1):47. <https://doi.org/10.1186/s42269-023-01013-0> PMID: 36987521
97. Shey RA, Ghogomu SM, Esoh KK, Nebangwa ND, Shintouo CM, Nongley NF, et al. In-silico design of a multi-epitope vaccine candidate against onchocerciasis and related filarial diseases. *Scientific reports*. 2019; 9(1):4409.
98. Singh P, Shaikh S, Gupta S, Gupta R. In-silico development of multi-epitope subunit vaccine against lymphatic filariasis. *Journal of Biomolecular Structure and Dynamics*. 1–15. <https://doi.org/10.1080/07391102.2023.2294838> PMID: 38117103
99. Khatoon N, Pandey RK, Prajapati VK. Exploring Leishmania secretory proteins to design B and T cell multi-epitope subunit vaccine using immunoinformatics approach. *Scientific reports*. 2017; 7(1):8285. <https://doi.org/10.1038/s41598-017-08842-w> PMID: 28811600
100. Scheibelhofer S, Laimer J, Machado Y, Weiss R, Thalhamer J. Influence of protein fold stability on immunogenicity and its implications for vaccine design. Expert review of vaccines. 2017; 16(5):479–89. <https://doi.org/10.1080/14760584.2017.1306441> PMID: 28290225
